## Predictive factors of a prolonged total ischemic time in patients presenting with ST-segment elevation myocardial infarction

M.T. Lopez Lluva<sup>1</sup>, A. Jurado Roman<sup>2</sup>, F. Lozano Ruiz Poveda<sup>1</sup>, J. Abellan Huertas<sup>1</sup>, R. Frias Garcia<sup>1</sup>, I. Sanchez Perez<sup>1</sup>

<sup>1</sup>University General Hospital of Ciudad Real, Ciudad Real, Spain; <sup>2</sup>University Hospital La Paz, Madrid, Spain

**Funding Acknowledgement:** Type of funding source: None

**Introduction:** Total ischemic time (TIT), the time from symptom onset to therapeutic reperfusion of infarcted myocardium is a key factor in the treatment of patients with ST-segment elevation myocardial infarction (STEMI). The identification of the predictive factors of a prolonged TIT will allow design specific strategies to optimize this time and improve the quality of care of these patients. Our objective was to evaluate independent factors predicting prolonged TIT.

**Methods:** We performed a prospective observational study, with consecutive inclusion of all patients presenting within 24 hours of symptom onset of STEMI (n=546), transferred to our center for primary percutaneous coronary intervention (pPCI).

**Results:** The median TIT was 190 (137–281) minutes. No significant differences were found according to the year of study. In the univariate analysis, age showed a slight trend (p=0.05); for each year that is increased, the TIT increases 1.3 minutes. Women had higher TIT than men [219 (145–332) vs. 187 (133–270) minutes; p=0.02]. No statistically significant differences were found in relation to the presence of cardiovascular risk factors. Patients treated during non-working hours had shorter TIT than those

treated during working hours [179 (130–252) vs. 202 (142–307) minutes; p=0.03]. The distance to a 24h-PCI hospital was an independent predictive factor. Those patients whose first medical contact (FMC) was in a non-PCI-capable hospital or in a clinic showed the highest TIT [226 (147–336) and 205 (146–304) minutes, respectively; p<0.001]. Patients with initial non-diagnostic ECG presented a significantly longer TIT (p<0.001) than patients correctly diagnosed since the beginning, with a median difference of 188 minutes. A trend was observed for the Killip-Kimball classification variable (p=0.07). Patients with previous infarction had shorter TIT compared to those who have never had it (p=0.02). In the multivariate binary logistic regression analysis, the variables: initial non-diagnostic ECG, FMC (in a non-PCI-capable hospital or clinic) and the distance to 24h-PCI hospital (>90 km) were independent predictive factors of a TIT >180 minutes. An initial non-diagnostic or misinterpreted ECG sextuples the risk of a prolonged TIT.

**Conclusions:** In our area, the total ischemic time is determined by a non-diagnostic or misinterpreted EKG, the first medical contact and the distance to a 24h-PCI hospital.
